# Supplementary material for: Electrodeposition of germanium at elevated temperatures and pressures from ionic liquids
Source: Royal Society of Chemistry journal article supplement (doi:10.1039/c4cp06076h), 2015-01-01
Supplement: c4cp06076h1.pdf [file c4cp06076h1.pdf]

# Electrodeposition of germanium at elevated temperatures and pressures from ionic liquids

**Minxian Wu, Gijs Vanhoutte, Neil R. Brooks, Koen Binnemans, and Jan Fransaer**

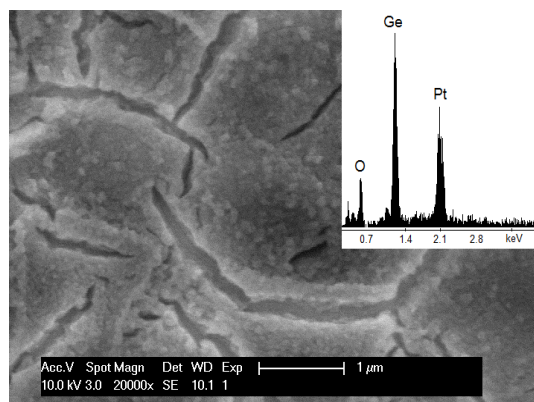

**Figure S1:** SEM image and EDX spectrum of the germanium film electrodeposited at -1.6 V from 0.4 M  $[\text{GeCl}_4(\text{BuIm})_2]$  in  $[\text{BMP}][\text{DCA}]$  at 120 °C. The working electrode was a platinum wafer, the counter electrode was a *p*-type wafer and the reference electrode was a platinum wire. The solution was stirred with a magnetic stirrer bar during electrodeposition.

**Table S1:** Viscosity of  $[\text{BMP}][\text{Tf}_2\text{N}]$  at different temperatures

| Temperature (°C) | Kinematic viscosity ( $10^{-6} \text{ m}^2 \text{ s}^{-1}$ ) | Dynamic viscosity ( $10^{-3} \text{ Pa s}$ ) |
|------------------|--------------------------------------------------------------|----------------------------------------------|
| 21               | 49.9                                                         | 69.7                                         |
| 50               | 19.1                                                         | 26.3                                         |
| 70               | 11.0                                                         | 14.9                                         |
| 80               | 8.8                                                          | 11.8                                         |
| 100              | 5.9                                                          | 7.8                                          |
| 120              | 4.3                                                          | 5.6                                          |
| 150              | 2.9                                                          | 3.8                                          |

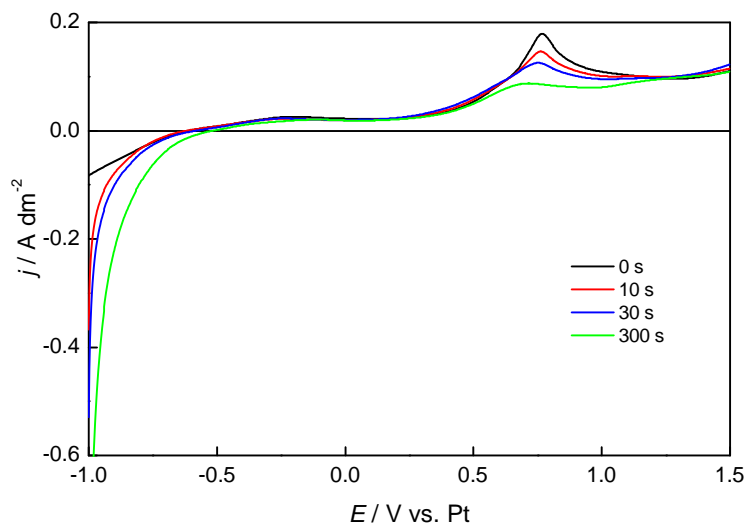

**Figure S2:** Linear scan voltammograms of  $[\text{BMP}][\text{Tf}_2\text{N}]$  solution containing 0.5 M  $\text{GeCl}_4$  at room temperature. The working electrode was a platinum disk ( $\phi = 1 \text{ mm}$ ) which was polarized at -1.0 V with the charge of  $-2 \text{ C dm}^{-2}$  and then kept at open circuit potential for different times of 0 s, 10 s, 30 s and 600 s before performing LSV. The counter electrode was a platinum coil.

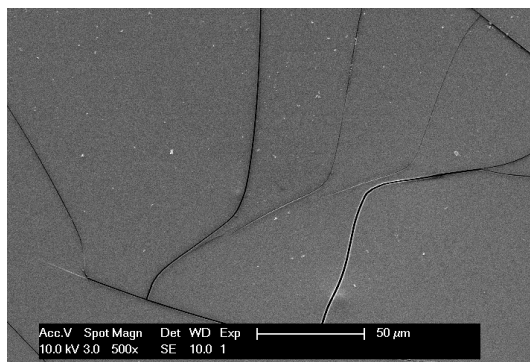

**Figure S3:** SEM image of the germanium film electrodeposited at -0.9 V at 150 °C for one hour. The counter electrode was a *p*-type germanium wafer. The solution was stirred by a magnetic stirrer bar.

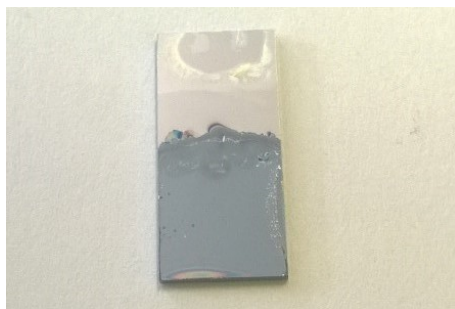

**Figure S4:** Photograph of the germanium film electrodeposited at -0.9 V at 180 °C for one hour. The counter electrode was a *p*-type germanium wafer. The solution was stirred by a magnetic stirrer bar.
